# Supplementary material
Source: Royal Society of Chemistry journal article supplement (doi:10.1039/d6dt00568c)
Supplement: d6dt00568c1.pdf [file d6dt00568c1.pdf]

## Supporting Information

# Broadband Infrared-Transparent Crystals Enabled by Heterologous Isomorphic Substitution

Bo Yang<sup>a,b</sup>, Ziqi Chen<sup>b,c</sup>, Zhenjiang Lu<sup>a,\*</sup> and Juanjuan Lu<sup>b,\*</sup>

<sup>a</sup> State Key Laboratory of Chemistry and Utilization of Carbon-Based Energy Resources, College of Chemistry, Xinjiang University, Urumqi 830017, People's Republic of China

<sup>b</sup> Research Center for Crystal Materials, Xinjiang Technical Institute of Physics and Chemistry, Chinese Academy of Sciences, Urumqi 830011, People's Republic of China

<sup>c</sup> Center of Materials Science and Optoelectronics Engineering, University of Chinese Academy of Sciences, Beijing 100049, People's Republic of China

\*Corresponding authors: [lujuan@ms.xjb.ac.cn](mailto:lujuan@ms.xjb.ac.cn), [luzj@xju.edu.cn](mailto:luzj@xju.edu.cn)

## Experimental Section

### Synthesis

The following starting materials are commercially available and used without additional purification: ZnI<sub>2</sub> (99%, Macklin), ZnCl<sub>2</sub> (99%, Macklin), RbCl (99.5%, Aladdin), KCl (99%, Aladdin), and NH<sub>4</sub>Cl (99%, Aladdin). The three compounds were successfully synthesized using a mild aqueous solution method, with the following stoichiometric ratios: RbCl (0.7256 g, 6 mmol), ZnCl<sub>2</sub> (0.1363 g, 1 mmol), ZnI<sub>2</sub> (0.3192 g, 1 mmol), and 20 mL of deionized water were used to prepare Rb<sub>3</sub>ZnCl<sub>4</sub>I; KCl (0.4474 g, 3 mmol), ZnCl<sub>2</sub> (0.1363 g, 1 mmol), ZnI<sub>2</sub> (0.3192 g, 1 mmol), and 20 mL of deionized water were used to prepare K<sub>3</sub>ZnCl<sub>4</sub>I; NH<sub>4</sub>Cl (0.3209 g, 3 mmol), ZnCl<sub>2</sub> (0.1363 g, 1 mmol), ZnI<sub>2</sub> (0.3192 g, 1 mmol), and 20 mL of deionized water to prepare (NH<sub>4</sub>)<sub>3</sub>ZnCl<sub>4</sub>I; Place the above ingredients in a beaker, add 20 mL of deionized water, place on a 50 °C hot plate, and stir for 10 minutes until completely dissolved; After the reaction was complete, the pH was maintained at around 6.0. The solution was filtered hot through filter paper using a preheated funnel to remove insoluble impurities and dust, yielding a clear hot solution. The beaker was then covered with plastic wrap, into which 10-15 small holes were punctured, and left at room temperature to evaporate for approximately two weeks, resulting in crystals of the three compounds.

### Single Crystal Structure Data Collection.

The single-crystal XRD data were collected on a Bruker D8 Venture diffractometer using Mo K $\alpha$  radiation ( $\lambda = 0.71073 \text{ \AA}$ ) at room temperature. Data integration, cell refinement and absorption corrections of the data were completed by utilizing SAINT program.<sup>[1]</sup> The structure was solved with Olex2 and SHELXTL by direct methods.<sup>[2]</sup> All the atom positions were refined using full matrix least squares techniques, the final least squares refinement is on  $F_o^2$  with data having  $F_o^2 \geq 2\sigma(F_o^2)$ . The structure was checked for missing symmetry elements by the program PLATON,<sup>[3]</sup> and no higher symmetries were found. Relevant crystallographic data are listed in Table S1.

### Powder X-ray Diffraction

The powder X-ray diffraction data was collected using a Bruker D2 PHASER diffractometer. The recorded  $2\theta$  patterns from 10 to 70° with a counting rate of 1 s per step and a scanning step width of 0.02 ° were selected. The purity of the polycrystalline was confirmed by powder X-ray diffraction, and the experimental pattern agrees well with the calculated result (Figure S2).

## **Thermal Analysis**

The thermal gravimetric (TG) analysis and differential scanning calorimetry (DSC) of  $A_3ZnCl_4I$  ( $A = K, Rb, \text{ and } NH_4$ ) were carried out on a simultaneous NETZSCH STA 449C thermal analyzer instrument to evaluate the thermal stability of the compounds. The powder samples were placed into a Pt crucible and heated from 40 to 600 °C at a rate of 5 °C·min<sup>-1</sup> under a flowing of N<sub>2</sub> atmosphere. TG-DSC curves of  $A_3ZnCl_4I$  ( $A = K, Rb, \text{ and } NH_4$ ) were obtained, and calcination experiments were performed based on the corresponding peak temperatures.

## **UV-vis-NIR transmittance spectra Measurement**

The UV-Vis-IR transmittance spectra data for the single-crystal of  $A_3ZnCl_4I$  ( $A = K, Rb, \text{ and } NH_4$ ) were collected using a Shimadzu SolidSpec-3700DUV spectrophotometer with the measurement range extending from 200 to 1400 nm.

## **Calculation details**

The theoretical calculations of all the title compounds were performed with the plane-wave pseudopotential method implemented in the CASTEP, and the electronic structures of reported series were determined based on density functional theory (DFT).<sup>[4]</sup> The optimized norm-conserving pseudopotentials were used to simulate ion–electron interactions for all the constituent elements in reported compounds. The exchange and correlation effects were treated by the Perdew–Burke–Ernzerhof (PBE) method in generalized gradient approximation (GGA).<sup>[5-6]</sup> The kinetic energy cutoffs and Monkhorst–Pack k-point meshes of all compounds were set as 830 eV. The Monkhorst–Pack k-point meshes of compounds were set as 4×2×3.

**Table S1.** Crystal data and structure refinement parameters of Rb<sub>3</sub>ZnCl<sub>4</sub>I, K<sub>3</sub>ZnCl<sub>4</sub>I, and (NH<sub>4</sub>)<sub>3</sub>ZnCl<sub>4</sub>I.

| Empirical formula                                            | Rb <sub>3</sub> ZnCl <sub>4</sub> I                                         | K <sub>3</sub> ZnCl <sub>4</sub> I                                          | (NH <sub>4</sub> ) <sub>3</sub> ZnCl <sub>4</sub> I                         |
|--------------------------------------------------------------|-----------------------------------------------------------------------------|-----------------------------------------------------------------------------|-----------------------------------------------------------------------------|
| Formula weight                                               | 590.48                                                                      | 451.37                                                                      | 388.20                                                                      |
| Crystal system                                               | orthorhombic                                                                | orthorhombic                                                                | orthorhombic                                                                |
| Space group                                                  | <i>Cmcm</i>                                                                 | <i>Cmcm</i>                                                                 | <i>Cmcm</i>                                                                 |
| <i>a</i> /Å                                                  | 7.1693(5)                                                                   | 7.0381(4)                                                                   | 7.1178(5)                                                                   |
| <i>b</i> /Å                                                  | 16.8387(12)                                                                 | 16.4906(13)                                                                 | 16.7739(9)                                                                  |
| <i>c</i> /Å                                                  | 10.0487(7)                                                                  | 9.6952(6)                                                                   | 9.9227(5)                                                                   |
| <i>α</i> /°                                                  | 90                                                                          | 90                                                                          | 90                                                                          |
| Volume/Å <sup>3</sup>                                        | 1213.10(15)                                                                 | 1125.25(13)                                                                 | 1184.70(12)                                                                 |
| <i>Z</i>                                                     | 4                                                                           | 4                                                                           | 4                                                                           |
| $\rho_{\text{calc}}$ /cm <sup>3</sup>                        | 3.233                                                                       | 2.664                                                                       | 2.176                                                                       |
| $\mu$ /mm <sup>-1</sup>                                      | 17.345                                                                      | 6.915                                                                       | 5.527                                                                       |
| <i>F</i> (000)                                               | 1048.0                                                                      | 832.0                                                                       | 736.0                                                                       |
| Radiation                                                    | MoK $\alpha$ ( $\lambda$ = 0.71073)                                         | MoK $\alpha$ ( $\lambda$ = 0.71073)                                         | MoK $\alpha$ ( $\lambda$ = 0.71073)                                         |
| 2 $\theta$ range for data collection/°                       | 4.838 to 55.146                                                             | 4.94 to 55.042                                                              | 6.218 to 54.988                                                             |
| Index ranges                                                 | -9 ≤ <i>h</i> ≤ 9, -21 ≤ <i>k</i> ≤ 21, -13 ≤ <i>l</i> ≤ 13                 | -9 ≤ <i>h</i> ≤ 9, -21 ≤ <i>k</i> ≤ 21, -12 ≤ <i>l</i> ≤ 12                 | -9 ≤ <i>h</i> ≤ 9, -21 ≤ <i>k</i> ≤ 21, -12 ≤ <i>l</i> ≤ 12                 |
| Reflections collected                                        | 11529                                                                       | 12218                                                                       | 11595                                                                       |
| Independent reflections                                      | 796 [ <i>R</i> <sub>int</sub> = 0.0420, <i>R</i> <sub>sigma</sub> = 0.0218] | 745 [ <i>R</i> <sub>int</sub> = 0.0377, <i>R</i> <sub>sigma</sub> = 0.0154] | 778 [ <i>R</i> <sub>int</sub> = 0.0372, <i>R</i> <sub>sigma</sub> = 0.0171] |
| Data/restraints/parameters                                   | 796/0/32                                                                    | 745/0/32                                                                    | 778/78/55                                                                   |
| Goodness-of-fit on <i>F</i> <sup>2</sup>                     | 1.096                                                                       | 1.093                                                                       | 1.147                                                                       |
| Final <i>R</i> indexes [ <i>I</i> ≥ 2 $\sigma$ ( <i>I</i> )] | <i>R</i> <sub>1</sub> = 0.0178, <i>wR</i> <sub>2</sub> = 0.0414             | <i>R</i> <sub>1</sub> = 0.0121, <i>wR</i> <sub>2</sub> = 0.0281             | <i>R</i> <sub>1</sub> = 0.0194, <i>wR</i> <sub>2</sub> = 0.0561             |
| Final <i>R</i> indexes [all data]                            | <i>R</i> <sub>1</sub> = 0.0185, <i>wR</i> <sub>2</sub> = 0.0418             | <i>R</i> <sub>1</sub> = 0.0128, <i>wR</i> <sub>2</sub> = 0.0283             | <i>R</i> <sub>1</sub> = 0.0203, <i>wR</i> <sub>2</sub> = 0.0566             |
| Largest diff. peak/hole / e Å <sup>-3</sup>                  | 0.70/-0.47                                                                  | 0.46/-0.29                                                                  | 0.58/-0.52                                                                  |

<sup>a</sup> $R_1 = \sum ||F_o| - |F_c|| / \sum |F_o|$  and  $wR_2 = [\sum w(F_o^2 - F_c^2)^2 / wF_o^4]^{1/2}$  for  $F_o^2 > 2\sigma(F_o^2)$ .

**Table S2.** Atomic coordinates ( $\times 10^4$ ), equivalent isotropic displacement parameters ( $\text{\AA}^2 \times 10^3$ ), and BVS results for  $\text{Rb}_3\text{ZnCl}_4\text{I}$ .  $U_{\text{eq}}$  is defined as 1/3 of the trace of the orthogonalised  $U_{ij}$  tensor.

| <b>Atom</b> | <b><i>x</i></b> | <b><i>y</i></b> | <b><i>z</i></b> | <b>U(eq)</b> | <b>BVS</b> |
|-------------|-----------------|-----------------|-----------------|--------------|------------|
| Rb1         | 10000           | 6572.4(2)       | 9832.7(3)       | 39.38(11)    | 0.95       |
| Rb2         | 5000            | 5563.2(2)       | 2500            | 32.69(12)    | 1.15       |
| Zn1         | 5000            | 6839.4(3)       | 7500            | 25.71(13)    | 2.06       |
| Cl1         | 5000            | 6140.3(5)       | 5600.7(8)       | 46.5(2)      | 0.99       |
| Cl2         | 7537.2(9)       | 7648.1(4)       | 7500            | 37.27(18)    | 1.03       |
| I1          | 10000           | 4946.2(2)       | 7500            | 36.01(11)    | 1.03       |

**Table S3.** Bond lengths for Rb<sub>3</sub>ZnCl<sub>4</sub>I

| Atom1 | Atom2             | Bond length | Atom1 | Atom2             | Bond length |
|-------|-------------------|-------------|-------|-------------------|-------------|
| Rb1   | Cl1 <sup>3</sup>  | 3.9281(10)  | Rb2   | Cl1 <sup>9</sup>  | 3.4453(10)  |
| Rb1   | Cl1 <sup>4</sup>  | 3.6836(3)   | Rb2   | Cl1 <sup>10</sup> | 3.4453(10)  |
| Rb1   | Cl1 <sup>5</sup>  | 3.6836(3)   | Rb2   | Cl1               | 3.2638(8)   |
| Rb1   | Cl2               | 3.4486(6)   | Rb2   | Cl1 <sup>11</sup> | 3.2638(8)   |
| Rb1   | Cl2 <sup>6</sup>  | 3.4951(6)   | Rb2   | Cl2 <sup>12</sup> | 3.4914(8)   |
| Rb1   | Cl2 <sup>2</sup>  | 3.4951(6)   | Rb2   | Cl2 <sup>13</sup> | 3.4914(8)   |
| Rb1   | Cl2 <sup>7</sup>  | 3.4486(6)   | Rb2   | I1 <sup>9</sup>   | 3.6859(3)   |
| Rb1   | I1                | 3.6046(4)   | Rb2   | I1 <sup>14</sup>  | 3.6859(3)   |
| Rb1   | I1 <sup>8</sup>   | 3.7045(4)   | Zn1   | Cl1 <sup>5</sup>  | 2.2424(8)   |
| Zn1   | Cl2               | 2.2722(7)   | Zn1   | Cl1               | 2.2424(8)   |
| Zn1   | Cl2 <sup>15</sup> | 2.2722(7)   |       |                   |             |

<sup>1</sup>1+X,+Y,+Z; <sup>2</sup>3/2-X,3/2-Y,2-Z; <sup>3</sup>3/2-X,3/2-Y,1/2+Z; <sup>4</sup>1+X,+Y,3/2-Z; <sup>5</sup>+X,+Y,3/2-Z; <sup>6</sup>2-X,+Y,3/2-Z; <sup>7</sup>1/2+X,3/2-Y,1/2+Z; <sup>8</sup>2-X,1-Y,2-Z; <sup>9</sup>1-X,1-Y,1-Z; <sup>10</sup>+X,+Y,1/2-Z; <sup>11</sup>1-X,1-Y,-1/2+Z; <sup>12</sup>-1/2+X,3/2-Y,-1/2+Z; <sup>13</sup>3/2-X,3/2-Y,1-Z; <sup>14</sup>2-X,1-Y,1-Z; <sup>15</sup>1-X,+Y,3/2-Z

**Table S4.** The angles for Rb<sub>3</sub>ZnCl<sub>4</sub>I.

| Atom1            | Atom2 | Atom3            | Angle/°     | Atom1             | Atom2 | Atom3             | Angle/°     |
|------------------|-------|------------------|-------------|-------------------|-------|-------------------|-------------|
| Cl1 <sup>5</sup> | Rb1   | Cl1 <sup>3</sup> | 102.529(15) | Cl2 <sup>15</sup> | Rb2   | Cl2 <sup>14</sup> | 60.76(2)    |
| Cl1 <sup>5</sup> | Rb1   | Cl1 <sup>4</sup> | 153.38(3)   | Cl2 <sup>14</sup> | Rb2   | I1 <sup>16</sup>  | 133.836(15) |
| Cl1 <sup>4</sup> | Rb1   | Cl1 <sup>3</sup> | 102.529(15) | Cl2 <sup>14</sup> | Rb2   | I1 <sup>11</sup>  | 73.079(13)  |
| Cl1 <sup>5</sup> | Rb1   | I1 <sup>6</sup>  | 87.086(13)  | Cl2 <sup>15</sup> | Rb2   | I1 <sup>11</sup>  | 133.836(15) |
| Cl1 <sup>4</sup> | Rb1   | I1 <sup>6</sup>  | 87.086(13)  | Cl2 <sup>15</sup> | Rb2   | I1 <sup>16</sup>  | 73.079(13)  |
| Cl2 <sup>8</sup> | Rb1   | Cl1 <sup>5</sup> | 132.170(18) | I1 <sup>11</sup>  | Rb2   | I1 <sup>16</sup>  | 153.085(15) |
| Cl2 <sup>2</sup> | Rb1   | Cl1 <sup>3</sup> | 58.742(15)  | Cl1 <sup>5</sup>  | Zn1   | Cl1               | 116.67(5)   |
| Cl2 <sup>7</sup> | Rb1   | Cl1 <sup>4</sup> | 61.651(17)  | Cl1               | Zn1   | Cl2 <sup>20</sup> | 108.337(15) |
| Cl2 <sup>7</sup> | Rb1   | Cl1 <sup>3</sup> | 67.578(15)  | Cl1 <sup>5</sup>  | Zn1   | Cl2 <sup>20</sup> | 108.337(15) |
| Cl2 <sup>8</sup> | Rb1   | Cl1 <sup>3</sup> | 58.742(15)  | Cl1 <sup>5</sup>  | Zn1   | Cl2               | 108.338(15) |
| Cl2              | Rb1   | Cl1 <sup>4</sup> | 121.442(17) | Cl1               | Zn1   | Cl2               | 108.337(15) |
| Cl2              | Rb1   | Cl1 <sup>5</sup> | 61.651(17)  | Cl1 <sup>11</sup> | Rb2   | Cl2 <sup>14</sup> | 135.909(12) |
| Cl2 <sup>7</sup> | Rb1   | Cl1 <sup>5</sup> | 121.442(17) | Cl1 <sup>13</sup> | Rb2   | Cl2 <sup>15</sup> | 75.116(16)  |
| Cl2 <sup>2</sup> | Rb1   | Cl1 <sup>5</sup> | 70.026(17)  | Cl1 <sup>12</sup> | Rb2   | Cl2 <sup>14</sup> | 135.909(12) |
| Cl2 <sup>2</sup> | Rb1   | Cl1 <sup>4</sup> | 132.170(18) | Cl1 <sup>12</sup> | Rb2   | Cl2 <sup>15</sup> | 135.909(12) |
| Cl2 <sup>8</sup> | Rb1   | Cl1 <sup>4</sup> | 70.026(17)  | Cl1               | Rb2   | Cl2 <sup>15</sup> | 75.116(16)  |
| Cl2              | Rb1   | Cl1 <sup>3</sup> | 67.578(15)  | Cl1 <sup>11</sup> | Rb2   | Cl2 <sup>15</sup> | 135.909(12) |
| Cl2              | Rb1   | Cl2 <sup>2</sup> | 93.299(7)   | Cl1 <sup>13</sup> | Rb2   | I1 <sup>16</sup>  | 93.973(4)   |
| Cl2 <sup>7</sup> | Rb1   | Cl2 <sup>2</sup> | 126.191(10) | Cl1 <sup>11</sup> | Rb2   | I1 <sup>16</sup>  | 78.828(7)   |
| Cl2 <sup>8</sup> | Rb1   | Cl2 <sup>2</sup> | 62.72(2)    | Cl1 <sup>13</sup> | Rb2   | I1 <sup>11</sup>  | 93.973(4)   |
| Cl2 <sup>7</sup> | Rb1   | Cl2              | 61.59(2)    | Cl1 <sup>12</sup> | Rb2   | I1 <sup>16</sup>  | 78.828(7)   |
| Cl2              | Rb1   | Cl2 <sup>8</sup> | 126.191(10) | Cl1               | Rb2   | I1 <sup>16</sup>  | 93.973(4)   |
| Cl2 <sup>7</sup> | Rb1   | Cl2 <sup>8</sup> | 93.299(7)   | Cl1               | Rb2   | I1 <sup>11</sup>  | 93.973(4)   |
| Cl2 <sup>8</sup> | Rb1   | I1               | 141.628(13) | Cl1 <sup>12</sup> | Rb2   | I1 <sup>11</sup>  | 78.828(7)   |
| Cl2 <sup>2</sup> | Rb1   | I1 <sup>6</sup>  | 72.807(13)  | Cl1 <sup>11</sup> | Rb2   | I1 <sup>11</sup>  | 78.828(7)   |
| Cl2 <sup>2</sup> | Rb1   | I1               | 141.628(13) | Cl1 <sup>13</sup> | Rb2   | Cl1 <sup>11</sup> | 140.96(2)   |
| Cl2 <sup>7</sup> | Rb1   | I1 <sup>6</sup>  | 148.687(11) | Cl1               | Rb2   | Cl1 <sup>13</sup> | 145.36(4)   |
| Cl2              | Rb1   | I1 <sup>6</sup>  | 148.687(11) | Cl1               | Rb2   | Cl1 <sup>12</sup> | 140.96(2)   |
| Cl2 <sup>7</sup> | Rb1   | I1               | 87.533(13)  | Cl1 <sup>13</sup> | Rb2   | Cl1 <sup>12</sup> | 73.68(2)    |
| Cl2              | Rb1   | I1               | 87.533(13)  | Cl1               | Rb2   | Cl1 <sup>11</sup> | 73.68(2)    |
| Cl2 <sup>8</sup> | Rb1   | I1 <sup>6</sup>  | 72.807(13)  | Cl1 <sup>12</sup> | Rb2   | Cl1 <sup>11</sup> | 67.28(3)    |
| I1               | Rb1   | Cl1 <sup>5</sup> | 76.881(15)  | Cl1               | Rb2   | Cl2 <sup>14</sup> | 75.116(16)  |
| I1               | Rb1   | Cl1 <sup>4</sup> | 76.881(15)  | Cl1 <sup>13</sup> | Rb2   | Cl2 <sup>14</sup> | 75.116(16)  |
| I1 <sup>6</sup>  | Rb1   | Cl1 <sup>3</sup> | 122.325(15) | I1                | Rb1   | I1 <sup>6</sup>   | 86.910(9)   |
| I1               | Rb1   | Cl1 <sup>3</sup> | 150.766(16) |                   |       |                   |             |

<sup>1</sup>1+X,+Y,+Z; <sup>2</sup>3/2-X,3/2-Y,2-Z; <sup>3</sup>3/2-X,3/2-Y,1/2+Z; <sup>4</sup>X,+Y,3/2-Z; <sup>5</sup>1+X,+Y,3/2-Z; <sup>6</sup>2-X,1-Y,2-Z; <sup>7</sup>1/2+X,3/2-Y,1/2+Z; <sup>8</sup>2-X,+Y,3/2-Z; <sup>9</sup>-1+X,+Y,-1+Z; <sup>10</sup>+X,+Y,-1+Z; <sup>11</sup>1-X,1-Y,1-Z; <sup>12</sup>+X,+Y,1/2-Z; <sup>13</sup>1-X,1-Y,-1/2+Z; <sup>14</sup>3/2-X,3/2-Y,1-Z; <sup>15</sup>-1/2+X,3/2-Y,-1/2+Z; <sup>16</sup>2-X,1-Y,1-Z; <sup>17</sup>-1+X,+Y,3/2-Z; <sup>18</sup>3/2-X,3/2-Y,-1/2+Z; <sup>19</sup>-1+X,+Y,+Z; <sup>20</sup>1-X,+Y,3/2-Z; <sup>21</sup>2-X,1-Y,-1/2+Z

**Table S5.** Atomic coordinates ( $\times 10^4$ ), equivalent isotropic displacement parameters ( $\text{\AA}^2 \times 10^3$ ), and BVS results for  $\text{K}_3\text{ZnCl}_4\text{I}$ .  $U_{\text{eq}}$  is defined as 1/3 of the trace of the orthogonalised U tensor.

| <b>Atom</b> | <b>x</b>  | <b>y</b>  | <b>z</b>  | <b>U(eq)</b> | <b>BVS</b> |
|-------------|-----------|-----------|-----------|--------------|------------|
| K1          | 0         | 3442.7(3) | 160.1(5)  | 47.90(13)    | 0.85       |
| K2          | 5000      | 4445.4(4) | 7500      | 37.12(15)    | 1.04       |
| Zn1         | 5000      | 3178.0(2) | 2500      | 26.79(9)     | 2.11       |
| Cl1         | 5000      | 3902.1(4) | 4446.2(5) | 56.69(18)    | 0.99       |
| Cl2         | 2438.0(7) | 2348.9(3) | 2500      | 45.78(14)    | 0.98       |
| I1          | 0         | 5048.9(2) | 2500      | 38.16(8)     | 0.96       |

**Table S6.** Bond lengths for K<sub>3</sub>ZnCl<sub>4</sub>I

| Atom1 | Atom2             | Bond length | Atom1 | Atom2             | Bond length |
|-------|-------------------|-------------|-------|-------------------|-------------|
| K1    | Cl2               | 3.3682(6)   | K2    | Cl1 <sup>14</sup> | 3.3145(8)   |
| K1    | Cl2 <sup>15</sup> | 3.3682(6)   | Zn1   | Cl2 <sup>8</sup>  | 2.2629(5)   |
| K1    | Cl2 <sup>7</sup>  | 3.4069(6)   | Zn1   | Cl2               | 2.2629(5)   |
| K1    | Cl2 <sup>16</sup> | 3.4069(6)   | Zn1   | Cl1               | 2.2330(6)   |
| K1    | Cl1 <sup>17</sup> | 3.6199(3)   | Zn1   | Cl1 <sup>5</sup>  | 2.2330(5)   |
| K1    | Cl1 <sup>5</sup>  | 3.6199(3)   | I1    | K2 <sup>1</sup>   | 3.6165(2)   |
| K2    | Cl2 <sup>11</sup> | 3.4204(8)   | I1    | K2 <sup>2</sup>   | 3.6165(2)   |
| K2    | Cl2 <sup>12</sup> | 3.4204(8)   | I1    | K1 <sup>3</sup>   | 3.5831(6)   |
| K2    | Cl1 <sup>1</sup>  | 3.3145(8)   | I1    | K1                | 3.4874(5)   |
| K2    | Cl1 <sup>13</sup> | 3.0933(6)   | I1    | K1 <sup>4</sup>   | 3.5831(6)   |
| K2    | Cl1               | 3.0933(6)   | I1    | K1 <sup>5</sup>   | 3.4874(5)   |

<sup>1</sup>1-X,1-Y,1-Z; <sup>2</sup>-X,1-Y,1-Z; <sup>3</sup>+X,+Y,1/2-Z; <sup>4</sup>-X,1-Y,-Z; <sup>5</sup>-X,1-Y,1/2+Z; <sup>6</sup>1/2-X,1/2-Y,-Z; <sup>7</sup>1/2-X,1/2-Y,1/2+Z; <sup>8</sup>1-X,+Y,1/2-Z; <sup>9</sup>1+X,+Y,1+Z; <sup>10</sup>+X,+Y,1+Z; <sup>11</sup>1/2-X,1/2-Y,1-Z; <sup>12</sup>1/2+X,1/2-Y,1/2+Z; <sup>13</sup>+X,+Y,3/2-Z; <sup>14</sup>1-X,1-Y,1/2+Z; <sup>15</sup>-1/2+X,1/2-Y,-1/2+Z; <sup>16</sup>-X,+Y,1/2-Z; <sup>17</sup>-1+X,+Y,1/2-Z

**Table S7.** The angles for K<sub>3</sub>ZnCl<sub>4</sub>I.

| Atom1             | Atom2 | Atom3             | Angle/°     | Atom1             | Atom2 | Atom3             | Angle/°     |
|-------------------|-------|-------------------|-------------|-------------------|-------|-------------------|-------------|
| Cl2 <sup>8</sup>  | Zn1   | Cl2               | 105.66(3)   | Cl1               | K2    | Cl1 <sup>13</sup> | 141.53(2)   |
| Cl1 <sup>4</sup>  | Zn1   | Cl2               | 108.852(11) | Cl1               | K2    | Cl1 <sup>1</sup>  | 72.137(19)  |
| Cl1               | Zn1   | Cl2 <sup>8</sup>  | 108.851(11) | Cl1 <sup>13</sup> | K2    | Cl1 <sup>1</sup>  | 69.40(2)    |
| Cl1 <sup>4</sup>  | Zn1   | Cl2 <sup>8</sup>  | 108.851(11) | Cl1 <sup>14</sup> | K2    | Cl1 <sup>13</sup> | 72.136(19)  |
| Cl1               | Zn1   | Cl2               | 108.851(11) | Cl1 <sup>14</sup> | K2    | Cl1 <sup>1</sup>  | 141.53(2)   |
| Cl1               | Zn1   | Cl1 <sup>4</sup>  | 115.34(4)   | I1                | K1    | I1 <sup>3</sup>   | 86.617(13)  |
| I1 <sup>1</sup>   | K2    | I1 <sup>2</sup>   | 153.34(2)   | I1 <sup>3</sup>   | K1    | Cl1 <sup>17</sup> | 86.022(12)  |
| Cl2 <sup>11</sup> | K2    | I1 <sup>2</sup>   | 133.442(18) | I1                | K1    | Cl1 <sup>4</sup>  | 76.847(12)  |
| Cl2 <sup>12</sup> | K2    | I1 <sup>1</sup>   | 133.442(18) | I1 <sup>3</sup>   | K1    | Cl1 <sup>4</sup>  | 86.022(12)  |
| Cl2 <sup>12</sup> | K2    | I1 <sup>2</sup>   | 73.222(11)  | I1                | K1    | Cl1 <sup>17</sup> | 76.847(12)  |
| Cl2 <sup>11</sup> | K2    | I1 <sup>1</sup>   | 73.222(11)  | Cl2 <sup>18</sup> | K1    | I1                | 88.200(14)  |
| Cl2 <sup>12</sup> | K2    | Cl2 <sup>11</sup> | 60.22(2)    | Cl2               | K1    | I1 <sup>3</sup>   | 148.935(10) |
| Cl1               | K2    | I1 <sup>1</sup>   | 93.829(3)   | Cl2 <sup>7</sup>  | K1    | I1 <sup>3</sup>   | 73.808(13)  |
| Cl1 <sup>1</sup>  | K2    | I1 <sup>1</sup>   | 79.071(9)   | Cl2               | K1    | I1                | 88.201(14)  |
| Cl1 <sup>1</sup>  | K2    | I1 <sup>2</sup>   | 79.071(9)   | Cl2 <sup>19</sup> | K1    | I1 <sup>3</sup>   | 73.808(13)  |
| Cl1 <sup>13</sup> | K2    | I1 <sup>2</sup>   | 79.071(9)   | Cl2 <sup>19</sup> | K1    | I1                | 141.579(13) |
| Cl1               | K2    | I1 <sup>2</sup>   | 93.829(3)   | Cl2 <sup>7</sup>  | K1    | I1                | 141.579(13) |
| Cl1 <sup>14</sup> | K2    | I1 <sup>1</sup>   | 93.829(3)   | Cl2 <sup>18</sup> | K1    | I1 <sup>3</sup>   | 148.935(9)  |
| Cl1 <sup>14</sup> | K2    | I1 <sup>2</sup>   | 93.829(3)   | Cl2               | K1    | Cl2 <sup>7</sup>  | 92.006(9)   |
| Cl1 <sup>13</sup> | K2    | I1 <sup>1</sup>   | 79.071(9)   | Cl2               | K1    | Cl2 <sup>19</sup> | 125.049(16) |
| Cl1 <sup>13</sup> | K2    | Cl2 <sup>12</sup> | 135.334(9)  | Cl2 <sup>19</sup> | K1    | Cl2 <sup>7</sup>  | 63.913(17)  |
| Cl1 <sup>14</sup> | K2    | Cl2 <sup>12</sup> | 75.491(16)  | Cl2 <sup>18</sup> | K1    | Cl2               | 61.253(18)  |
| Cl1 <sup>14</sup> | K2    | Cl2 <sup>11</sup> | 75.491(16)  | Cl2 <sup>18</sup> | K1    | Cl2 <sup>19</sup> | 92.007(9)   |
| Cl1 <sup>13</sup> | K2    | Cl2 <sup>11</sup> | 135.334(9)  | Cl2 <sup>18</sup> | K1    | Cl2 <sup>7</sup>  | 125.050(16) |
| Cl1 <sup>1</sup>  | K2    | Cl2 <sup>11</sup> | 135.334(9)  | Cl2 <sup>7</sup>  | K1    | Cl1 <sup>17</sup> | 132.420(17) |
| Cl1 <sup>1</sup>  | K2    | Cl2 <sup>12</sup> | 135.334(9)  | Cl2 <sup>18</sup> | K1    | Cl1 <sup>17</sup> | 62.986(13)  |
| Cl1               | K2    | Cl2 <sup>12</sup> | 75.490(16)  | Cl2 <sup>19</sup> | K1    | Cl1 <sup>4</sup>  | 132.420(17) |
| Cl1               | K2    | Cl2 <sup>11</sup> | 75.490(16)  | Cl2               | K1    | Cl1 <sup>4</sup>  | 62.986(13)  |
| Cl1               | K2    | Cl1 <sup>14</sup> | 146.33(3)   | Cl2 <sup>18</sup> | K1    | Cl1 <sup>4</sup>  | 122.432(17) |
| Cl2               | K1    | Cl1 <sup>17</sup> | 122.432(17) | Cl2 <sup>7</sup>  | K1    | Cl1 <sup>4</sup>  | 69.237(13)  |
| Cl1 <sup>4</sup>  | K1    | Cl1 <sup>17</sup> | 152.89(3)   | Cl2 <sup>19</sup> | K1    | Cl1 <sup>17</sup> | 69.237(13)  |

<sup>1</sup>1-X,1-Y,1-Z; <sup>2</sup>-X,1-Y,1-Z; <sup>3</sup>+X,+Y,1/2-Z; <sup>4</sup>-X,1-Y,-Z; <sup>5</sup>-X,1-Y,1/2+Z; <sup>6</sup>1/2-X,1/2-Y,1/2+Z; <sup>7</sup>1/2-X,1/2-Y,-Z; <sup>8</sup>1-X,+Y,1/2-Z; <sup>9</sup>1+X,+Y,1+Z; <sup>10</sup>+X,+Y,1+Z; <sup>11</sup>1/2+X,1/2-Y,1/2+Z; <sup>12</sup>1/2-X,1/2-Y,1-Z; <sup>13</sup>1-X,1-Y,1/2+Z; <sup>14</sup>+X,+Y,3/2-Z; <sup>15</sup>+X,+Y,-1+Z; <sup>16</sup>-1+X,+Y,-1+Z; <sup>17</sup>-1+X,+Y,1/2-Z; <sup>18</sup>-X,+Y,1/2-Z; <sup>19</sup>-1/2+X,1/2-Y,-1/2+Z; <sup>20</sup>1+X,+Y,1/2-Z

**Table S8.** Atomic coordinates ( $\times 10^4$ ), equivalent isotropic displacement parameters ( $\text{\AA}^2 \times 10^3$ ), and BVS results for  $(\text{NH}_4)_3\text{ZnCl}_4\text{I}$ .  $U_{\text{eq}}$  is defined as 1/3 of the trace of the orthogonalised U tensor.

| <b>Atom</b> | <b>x</b>   | <b>y</b>   | <b>z</b>  | <b>U(eq)</b> | <b>BVS</b> |
|-------------|------------|------------|-----------|--------------|------------|
| N1          | 5000       | 3440.5(19) | 4807(3)   | 45.1(8)      | -          |
| N2          | 10000      | 5539(3)    | 2500      | 36.9(9)      | -          |
| Zn1         | 10000      | 3145.4(3)  | 2500      | 27.51(16)    | 2.05       |
| Cl1         | 7455.0(12) | 2329.3(5)  | 2500      | 41.6(2)      | -          |
| Cl2         | 10000      | 3862.0(6)  | 4408.5(8) | 50.6(3)      | -          |
| I1          | 5000       | 5062.4(2)  | 2500      | 41.58(15)    | -          |

**Table S9.** Bond lengths for (NH<sub>4</sub>)<sub>3</sub>ZnCl<sub>4</sub>I

| Atom | Atom             | Length/Å  | Atom | Atom             | Length/Å  |
|------|------------------|-----------|------|------------------|-----------|
| Zn1  | Cl1              | 2.2706(9) | Zn1  | Cl2              | 2.2430(9) |
| Zn1  | Cl1 <sup>1</sup> | 2.2705(9) | Zn1  | Cl2 <sup>2</sup> | 2.2430(9) |

<sup>1</sup>2-X,+Y,1/2-Z; <sup>2</sup>+X,+Y,1/2-Z

**Table S10.** The angles for (NH<sub>4</sub>)<sub>3</sub>ZnCl<sub>4</sub>I

| Atom             | Atom | Atom             | Angle/°     | Atom             | Atom | Atom             | Angle/°     |
|------------------|------|------------------|-------------|------------------|------|------------------|-------------|
| Cl1 <sup>1</sup> | Zn1  | Cl1              | 105.85(5)   | Cl2 <sup>2</sup> | Zn1  | Cl1 <sup>1</sup> | 108.850(18) |
| Cl2              | Zn1  | Cl1              | 108.851(18) | Cl2 <sup>2</sup> | Zn1  | Cl1              | 108.851(17) |
| Cl2              | Zn1  | Cl1 <sup>1</sup> | 108.850(18) | Cl2 <sup>2</sup> | Zn1  | Cl2              | 115.19(6)   |

<sup>1</sup>2-X,+Y,1/2-Z; <sup>2</sup>+X,+Y,1/2-Z

**Figure S1.** The experimental and calculated PXRD patterns of (a)  $\text{Rb}_3\text{ZnCl}_4\text{I}$ , (b)  $\text{K}_3\text{ZnCl}_4\text{I}$ , and (c)  $(\text{NH}_4)_3\text{ZnCl}_4\text{I}$ . Among them, the crystals of  $\text{Rb}_3\text{ZnCl}_4\text{I}$  and  $\text{K}_3\text{ZnCl}_4\text{I}$  were exposed to the air for two months, and the crystal of  $(\text{NH}_4)_3\text{ZnCl}_4\text{I}$  was exposed to the air for one week.

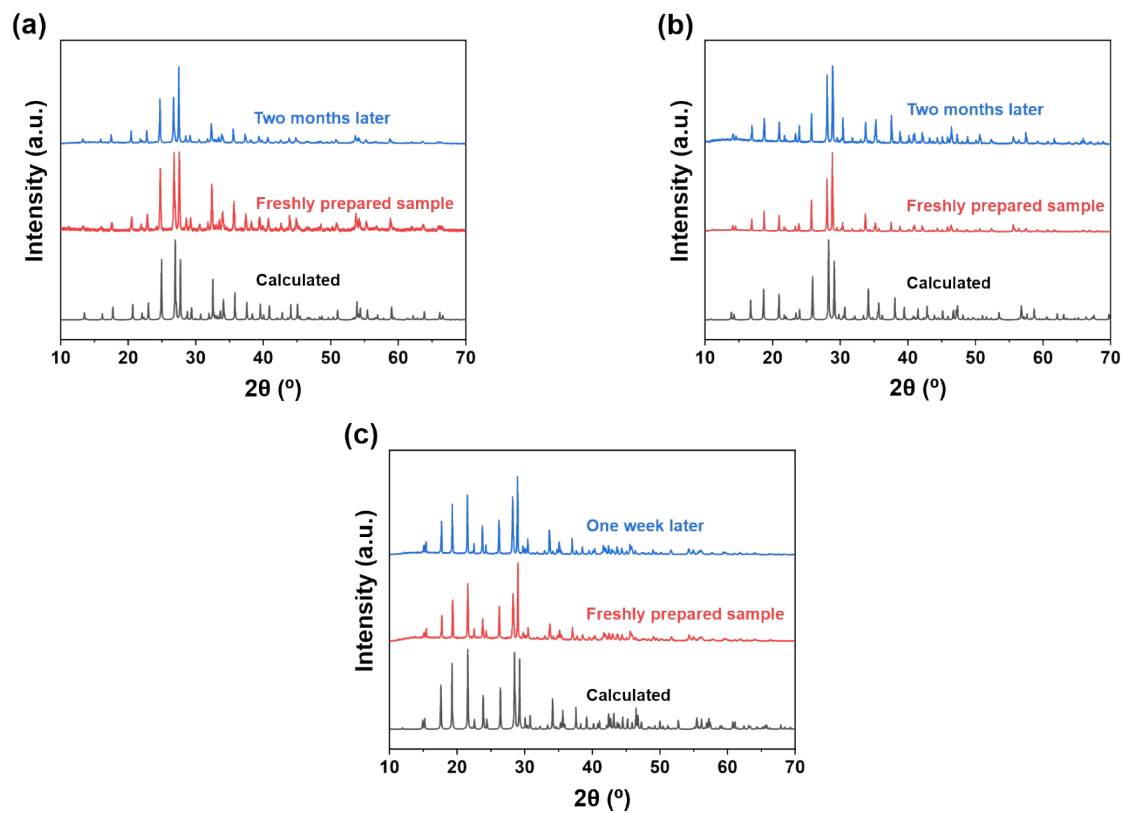

**Figure S2.** (a) Ba(1)S<sub>7</sub>I<sub>2</sub> and Ba(2)S<sub>6</sub>I<sub>2</sub> ligands and [GaS<sub>4</sub>] anion units. (b) Overall structure of Ba<sub>3</sub>GaS<sub>4</sub>I. (c) Layer formed by interconnected [Ba(1)S<sub>7</sub>I<sub>2</sub>] units along the a-axis. (d) Ba(1) atoms form parallel chains around S atoms. (e) Layer formed by interconnected [Ba(2)S<sub>6</sub>I<sub>2</sub>] units along the a-axis. (f) Ba(2) atoms connect via S atoms to form zigzag chains.

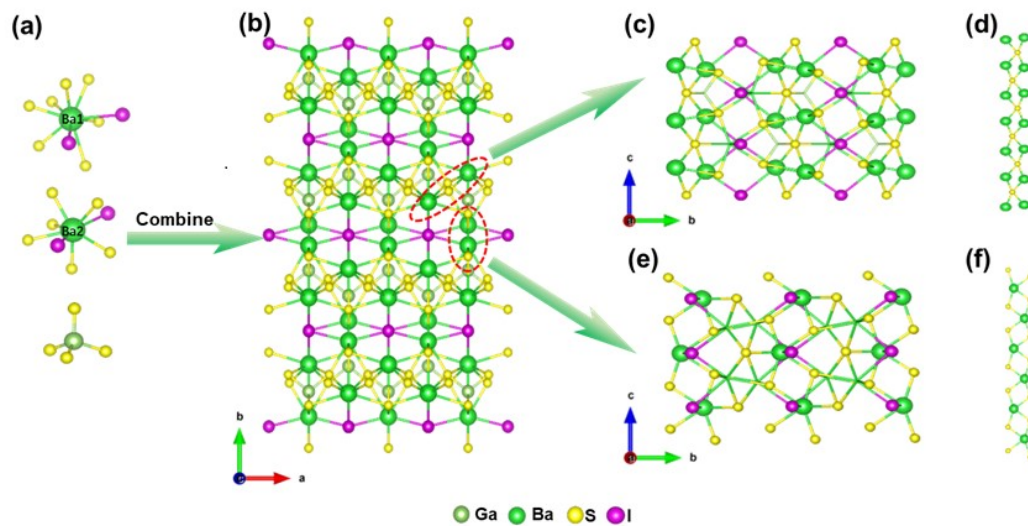

**Figure S3.** The band structure of (a)  $\text{Rb}_3\text{ZnCl}_4\text{I}$ , (b)  $\text{K}_3\text{ZnCl}_4\text{I}$ , (c)  $(\text{NH}_4)_3\text{ZnCl}_4\text{I}$ , and (d)  $\text{Ba}_3\text{GaS}_4\text{I}$  with GGA method.

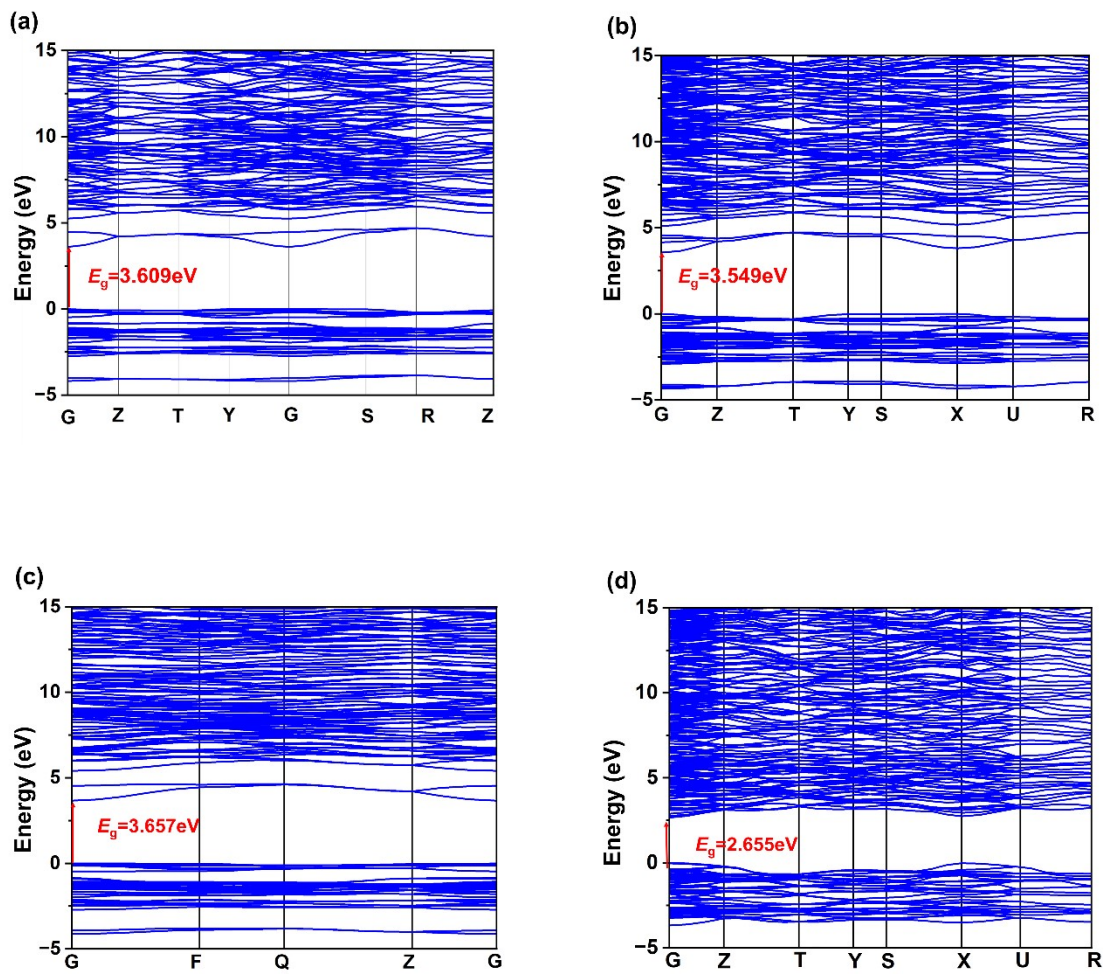

**Figure S4.** PDOS of (a)  $\text{Rb}_3\text{ZnCl}_4\text{I}$ , (b)  $\text{K}_3\text{ZnCl}_4\text{I}$ , (c)  $(\text{NH}_4)_3\text{ZnCl}_4\text{I}$ , and (d)  $\text{Ba}_3\text{GaS}_4\text{I}$ .

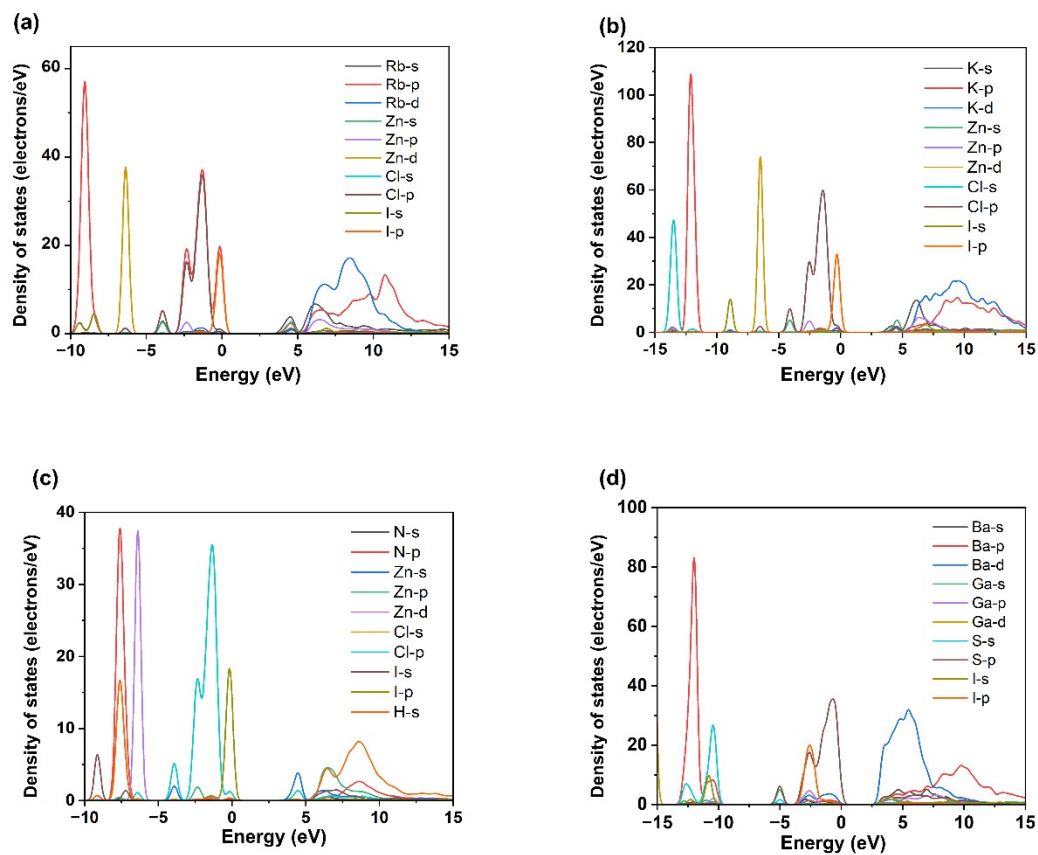

**Figure S5.** Calculated birefringence of (a)  $\text{Rb}_3\text{ZnCl}_4\text{I}$ , (b)  $\text{K}_3\text{ZnCl}_4\text{I}$ , and (c)  $(\text{NH}_4)_3\text{ZnCl}_4\text{I}$ .

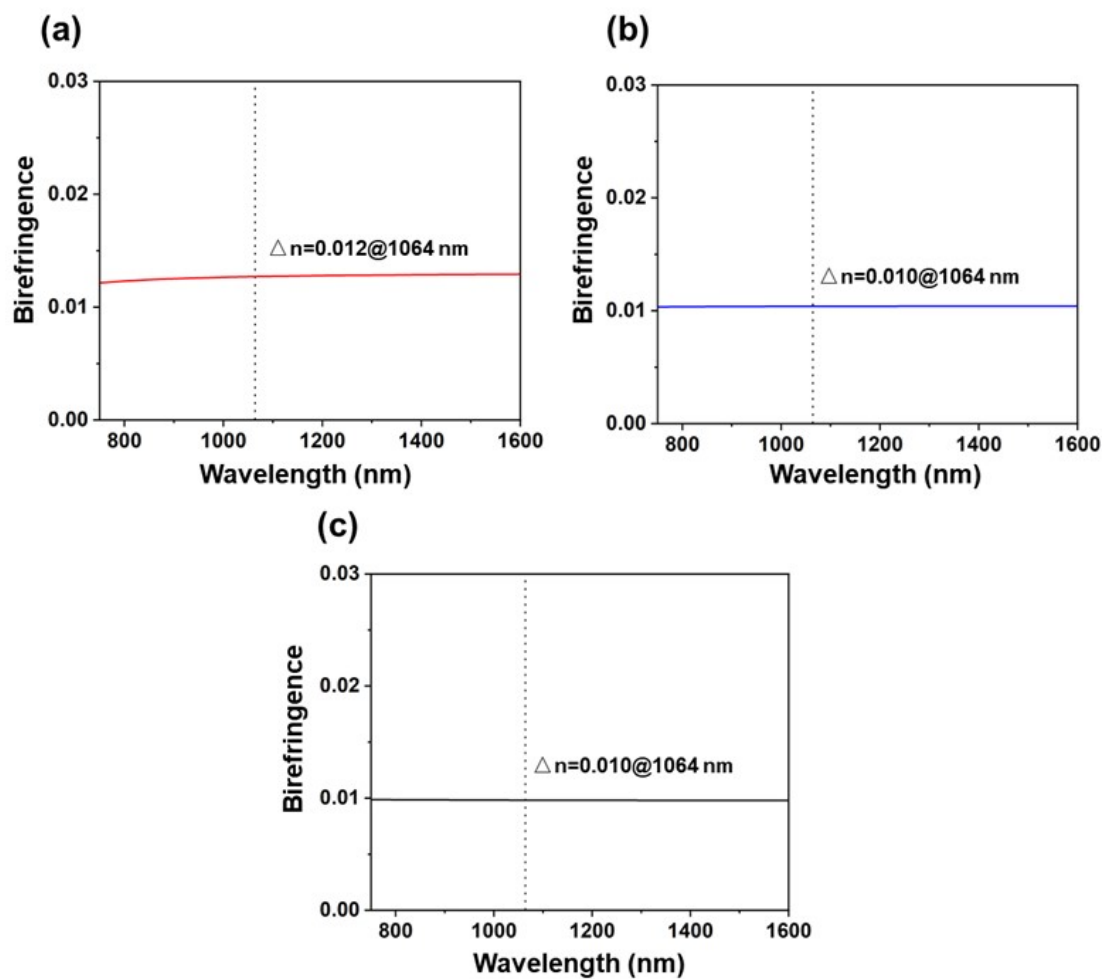

**Figure S6.** Calculated infrared (IR) absorption spectra of (a)  $\text{Rb}_3\text{ZnCl}_4\text{I}$ , (b)  $\text{K}_3\text{ZnCl}_4\text{I}$ , (c)  $(\text{NH}_4)_3\text{ZnCl}_4\text{I}$ , and (d)  $\text{Ba}_3\text{GaS}_4\text{I}$ .

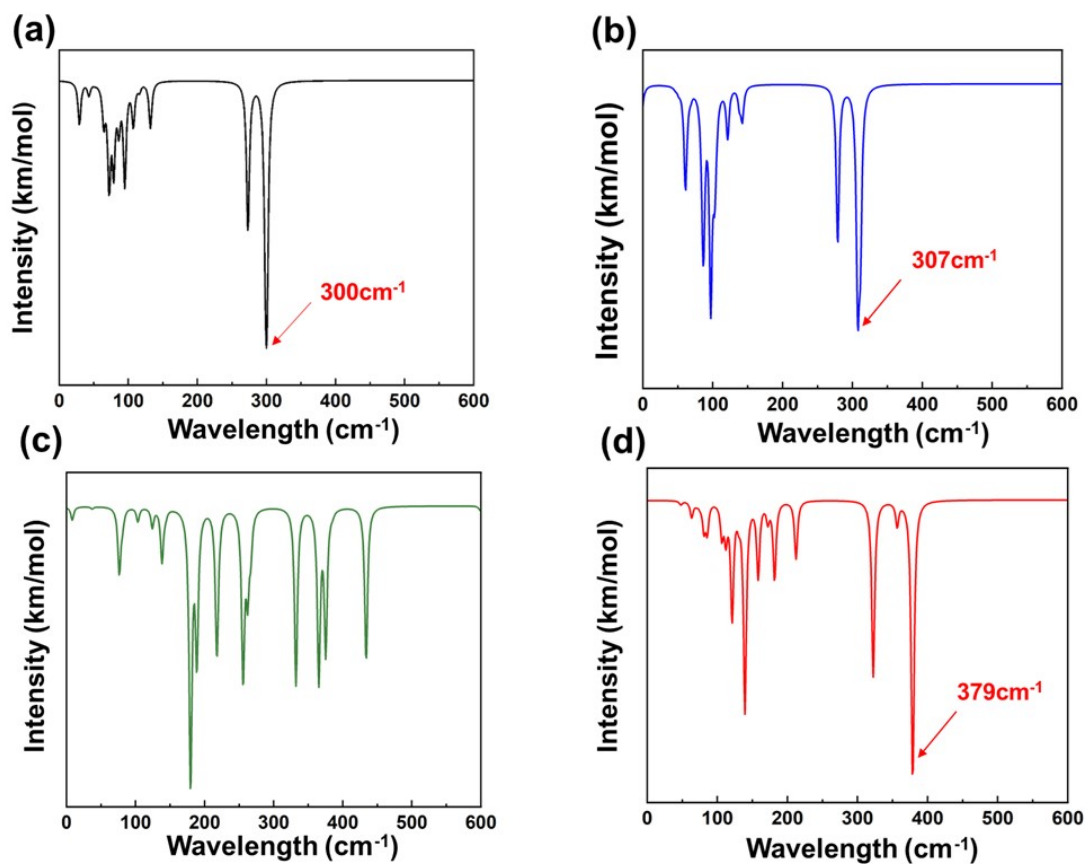

Figure S7. FT-IR spectrum of  $(\text{NH}_4)_3\text{ZnCl}_4\text{I}$ .

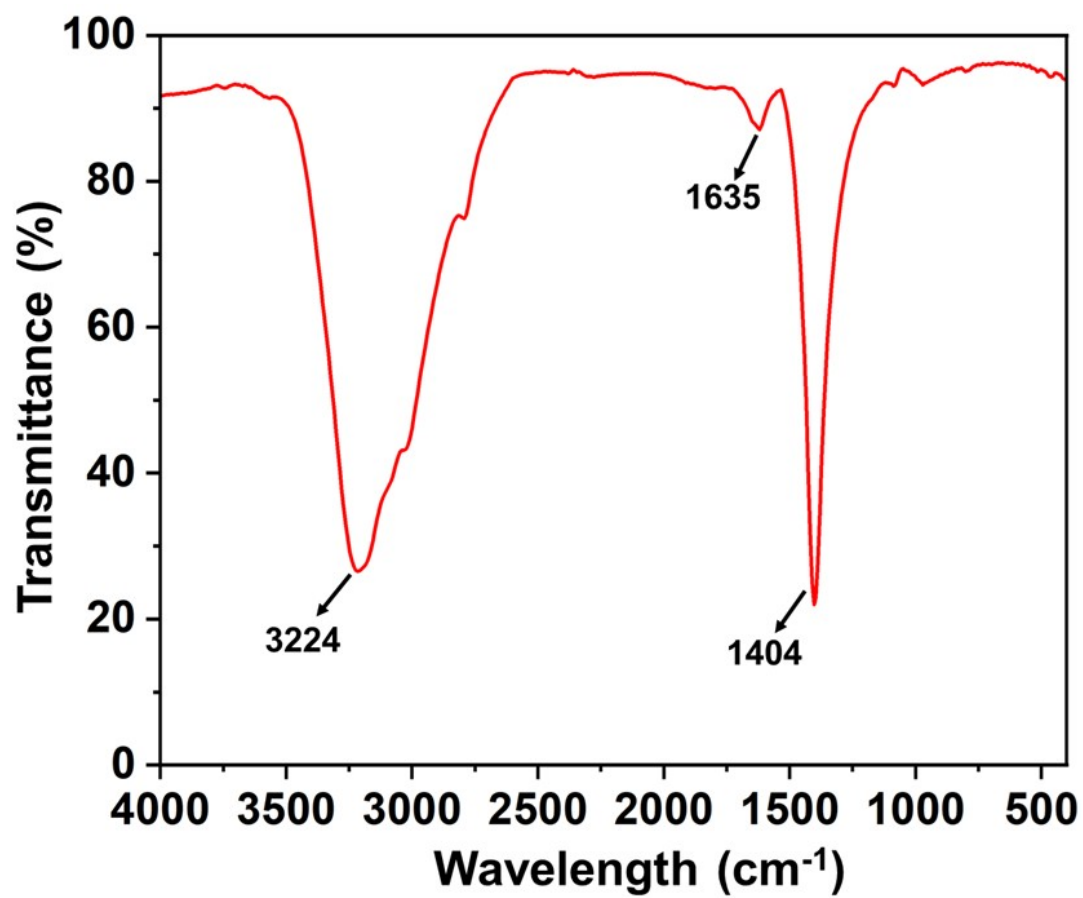

Figure S8. A bandgap comparison compounds containing chalcogenic tetrahedral units

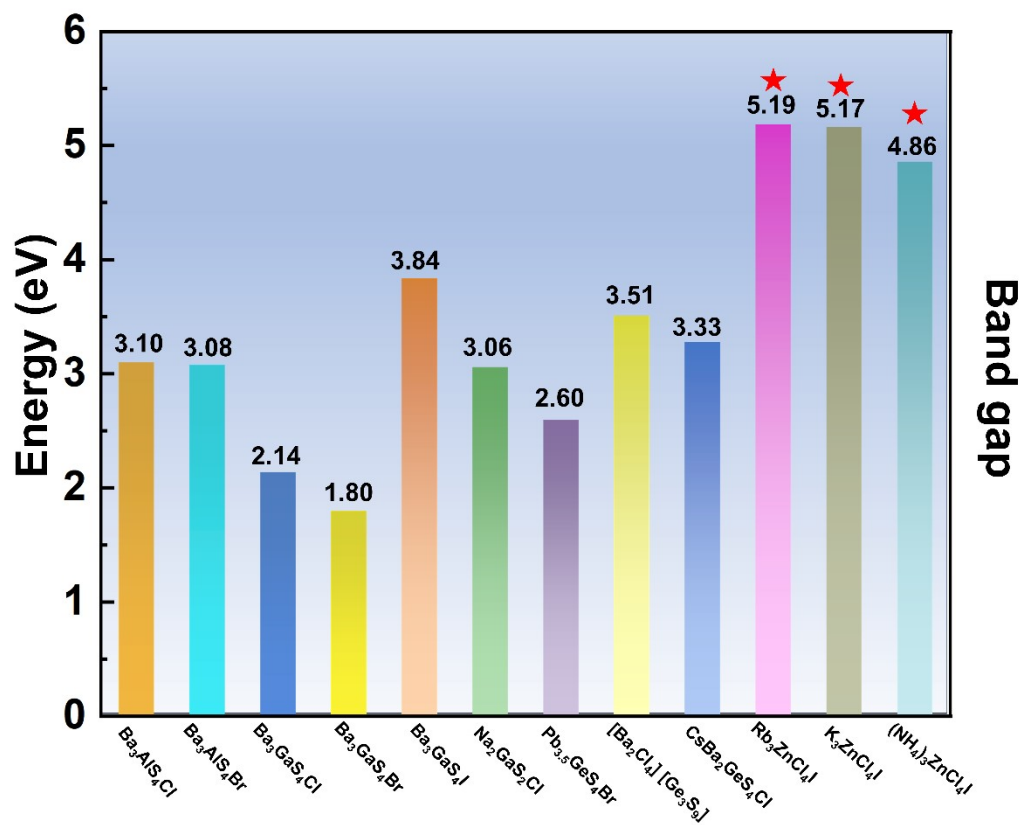

## References

- [1] SAINT V 2008 Inc., Madison, WI.
- [2] Sheldrick G 2008 *Acta Crystallogr. A* 64 112–122.
- [3] Spek A 2003 *J. Appl. Crystallogr.* 36 7–13
- [4] S. J. Clark, M. D. Segall, C. J. Pickard, P. J. Hasnip, M. I. Probert, K. Refson, M. C. Payne, *Z. Kristallogr. Cryst. Mater.*, 2005, 220, 567.
- [5] A. M. Rappe, K. M. Rabe, E. Kaxiras, J. D. Joannopoulos, *Phys. Rev. B*, 1990, 41, 1227.
- [6] J. S. Lin, A. Qteish, M. C. Payne, V. Heine, *Phys. Rev. B*, 1993, 47, 4174.
